# Supplementary material
Source: publisher site journal article supplement (https://www.degruyter.com/publication/journal_key/RAMS/downloadAsset/RAMS_CFP_Polymer%20and%20Composite%20Materials.pdf)

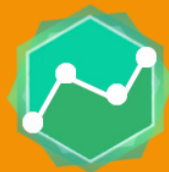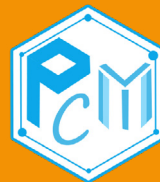

# SPECIAL ISSUES ON POLYMER AND COMPOSITE MATERIALS AND GRAPHENE AND NOVEL NANOMATERIALS

## GUEST EDITOR

---

Prof. Osman Adiguzel, Firat University, Elazig, Turkey

E-mail: [oadiguzel@firat.edu.tr](mailto:oadiguzel@firat.edu.tr)

## DESCRIPTION

---

We are thrilled to devote a new Special Issues on Polymer and Composite Materials and Graphene and Novel Nanomaterials. The participants of the 9th Global Conference on Polymer and Composite Materials (PCM 2022) and the 4th International Conference on Graphene and Novel Materials are encouraged to submit their unpublished manuscripts to these Special Issues.

This event has the objective of creating an international forum for academics, researchers, and scientists from worldwide to discuss worldwide results and proposals regarding the soundest issues related to Polymer, Composite Materials, Graphene and Novel Materials.

## HOW TO SUBMIT

---

We would like to highlight that all manuscripts will undergo the standard peer-review process (single-blind, with at least two independent reviewers). When entering your submission via the online submission system please choose "**Special Issue: PMC**". Submission of a manuscript implies that the work described has not been published before and is not under consideration for publication anywhere else.

The deadline for submissions is **June 30th, 2023**, but individual papers will be reviewed and published online on an ongoing basis.

What is in it for you?

Your benefits due to contribution to this Special Issue:

- ▶ indexation in Web of Science, SCOPUS, and many other services
- ▶ convenient, web-based paper submission and tracking system – Editorial Manager
- ▶ quick online publication upon completing the publishing process (continuous publication model)
- ▶ better visibility due to Open Access
- ▶ long-term preservation of the content (articles archived in Portico)
- ▶ extensive post-publication promotion for selected papers

In case of any further questions please contact the Managing Editor:

[Juliusz.Skoryna@degruyter.com](mailto:Juliusz.Skoryna@degruyter.com)

CHINA  
SHENZHEN

August, 2022

21-24

# PCM 2022

<http://www.cpcmconf.org/>

EI Scopus

E-mail: [pcm@cpcmconf.org](mailto:pcm@cpcmconf.org)

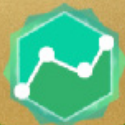

The 4th International Conference  
on Graphene and Novel  
Nanomaterials ( GNN 2022 )  
August 21-24, 2022 | Shenzhen, China

<http://www.gnnconf.org/>

- \* Organized by NCP-NPU
- \* Proceedings indexed by Scopus
- \* Keynote Speaker: Prof. Alexander Seifalian

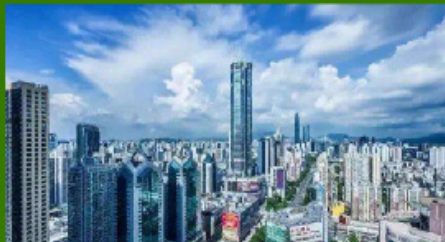

Supplement: Supplementary file 1 [file RAMS_CFP_Polymer%20and%20Composite%20Materials.pdf]
